# Supplementary material for: Evidence of telomere attrition and a potential role for DNA damage in systemic sclerosis
Source: PubMed Central journal article supplement (PMC8793167; doi:10.1186/s12979-022-00263-2), 2022-01-27
Supplement: 12979_2022_263_MOESM2_ESM.pdf [file 12979_2022_263_MOESM2_ESM.pdf]

**Additional File 2:****Table S1.** Primer sequences used for quantitative real-time PCR analysis.

| <b>Gene Name</b>     | <b>Forward Primer Sequence</b> | <b>Reverse Primer Sequence</b> |
|----------------------|--------------------------------|--------------------------------|
| <i>Acta2</i> (mouse) | 5'-GTCCCAGACATCAGGGAGTAA-3'    | 5'-TCGGATACTTCAGCGTCAGGA-3'    |
| <i>Ctgf</i> (mouse)  | 5'-CTGCCTACCGACTGGAAGAC-3'     | 5'-TCGCATCATAGTTGGGTC-3'       |
| <i>Gapdh</i> (mouse) | 5'-CATGGCCTCCGTGTTCCCTA-3'     | 5'-GCGGCACGTCAGATCCA-3'        |
| <i>COL1A1</i>        | 5'-GAGGGCCAAGACGAAGACATC-3'    | 5'-CAGATCACGTCATCGCACAAAC-3'   |
| <i>ACTA2</i>         | 5'-CTATGCCTCTGGACGCACAAC-3'    | 5'-CAGATCCAGACGCATGATGGCA-3'   |
| <i>CTGF</i>          | 5'-GAGTGGGTGTGTGAC-3'          | 5'-GGCAGTTGGCTCTAA-3'          |
| <i>HPRT</i>          | 5'-GCTGAGGATTTGGAAAGGGTG-3'    | 5'-CAGAGGGCTACAATGTGATGGC-3'   |

*Acta2/ACTA2*: actin alpha 2; *Ctgf/CTGF*: connective tissue growth factor; *Gapdh*: glyceraldehyde 3-phosphate dehydrogenase; *COL1A1*: collagen type I alpha 1 chain;; *HPRT*: hypoxanthine-guanine phosphoribosyltransferase.
